# Supplementary material
Source: publisher figshare collection journal article supplement (https://tandf.figshare.com/articles/dataset/_/1004797)
Supplement: Supplementary file 2 [file 2]

Archive with 2 entries (2 files):
- Appendix_BayHPV_blinded_V3.pdf
- Appendix_BayHPV_blinded_V3.tex
