# Supplementary material
Source: publisher figshare collection journal article supplement (https://tandf.figshare.com/articles/dataset/_/1004797)
Supplement: Supplementary file 2 [file 2 › Appendix_BayHPV_blinded_V3.tex]

\documentclass{article}
\usepackage{amsmath,amssymb,amsfonts}
\usepackage{amsmath}    % need for subequations
\usepackage{graphicx}   % need for figures
%\usepackage{JBS}
\usepackage{verbatim}   % useful for program listings
\usepackage{color}      % use if color is used in text
\usepackage{subfigure}  % use for side-by-side figures
\usepackage{hyperref}   % use for hypertext links, including those to external documents and URLs

\raggedbottom
%\evensidemargin 2pt
%\oddsidemargin\evensidemargin
\setlength{\topmargin}{-.5in}
\setlength{\oddsidemargin}{0.0in}
\setlength{\evensidemargin}{0.0in}
\setlength{\textwidth}{6.5in}
\setlength{\textheight}{9.0in}
\setlength{\parindent}{0.0in}
\parskip 2ex
\renewcommand{\arraystretch}{1.2}
\tabcolsep=0.17cm
\baselineskip=20pt

%\newcommand{\bi}{\bm{b_i}}
\newcommand{\bfy}{{\bf y}}
\newcommand{\prb}{\mbox{pr}}
\newcommand{\VSDH}{\widehat{\mbox{VSD}}}
\newcommand{\etavec}{\mbox{\boldmath $\eta$}}
\newcommand{\Thetavec}{\mbox{\boldmath $\Theta$}}
\newcommand{\betavec}{\mbox{\boldmath $\beta$}}
\newcommand{\bvec}{\mbox{\boldmath $b$}}
\newcommand{\vvec}{\mbox{\boldmath $v$}}
\newcommand{\xvec}{\mbox{\boldmath $x$}}
%\newcommand{\bi}{\begin{itemize}}
\newcommand{\ei}{\end{itemize}}
\newcommand{\Y}{\mbox{\boldmath $Y$}}
\newcommand{\g}{\mbox{\boldmath $g$}}
\newcommand{\md}{\mbox{\boldmath $d$}}
\newcommand{\mc}{\mbox{\boldmath $c$}}
\newcommand{\N}{\mbox{\boldmath $N$}}
\newcommand{\K}{\mbox{\boldmath $K$}}
\newcommand{\G}{\mbox{\boldmath $G$}}
\newcommand{\f}{\mbox{\boldmath $f$}}
\newcommand{\y}{\mbox{\boldmath $y$}}
\newcommand{\bft}{\mbox{\boldmath $t$}}
\newcommand{\bfb}{\mbox{\boldmath $b$}}
\newcommand{\X}{\mbox{\boldmath $X$}}
\newcommand{\R}{\mbox{\boldmath $R$}}
\newcommand{\V}{\mbox{\boldmath $V$}}
\newcommand{\W}{\mbox{\boldmath $W$}}
\newcommand{\T}{\mbox{\boldmath $T$}}
\newcommand{\M}{\mbox{\boldmath $M$}}
\newcommand{\F}{\mbox{\boldmath $F$}}
\newcommand{\tvet}{\mbox{\boldmath $t$}}
\newcommand{\U}{\mbox{\boldmath $U$}}
\newcommand{\x}{\mbox{\boldmath $x$}}
\newcommand{\bb}{\mbox{\boldmath $b$}}
\newcommand{\vt}{\mbox{\boldmath $t$}}
\newcommand{\bt}{\mbox{\boldmath $t$}}
\newcommand{\bu}{\mbox{\boldmath $u$}}
\newcommand{\z}{\mbox{\boldmath $z$}}
\newcommand{\bfs}{\mbox{\boldmath $s$}}
\newcommand{\Z}{\mbox{\boldmath $Z$}}
\newcommand{\A}{\mbox{\boldmath $A$}}
\newcommand{\Q}{\mbox{\boldmath $Q$}}
%\newcommand{\D}{\mbox{\boldmath $D$}}
\newcommand{\boldb}{\mbox{\boldmath $b$}}
\newcommand{\vSigma}{\mbox{\boldmath $\Sigma$}}
\def\eqx"#1"{{\label{#1}}}
\def\eqn"#1"{{\ref{#1}}}
\newcommand{\ds}{\displaystyle}
\newcommand{\vTheta}{\mbox{\boldmath $\Theta$}}
\newcommand{\vGamma}{\mbox{\boldmath $\Gamma$}}
\newcommand{\bfbeta}{ {\mbox{\boldmath $\beta$}} }
\newcommand{\bhat}{\widehat{\mbox{\boldmath$\beta$}}}
\newcommand{\bfalpha}{ {\mbox{\boldmath $\alpha$}} }
\newcommand{\ahat}{\widehat{\mbox{$\alpha$}}}
\newcommand{\bftheta}{ {\mbox{\boldmath $\theta$}} }
\newcommand{\bfdelta}{ {\mbox{\boldmath $\delta$}} }
\newcommand{\bfgamma}{ {\mbox{\boldmath $\gamma$}} }
\newcommand{\bfpsi}{ {\mbox{\boldmath $\psi$}} }
\newcommand{\bfxi}{ {\mbox{\boldmath $\xi$}} }
\newcommand{\bfeta}{ {\mbox{\boldmath $\eta$}} }
\newcommand{\bfOmegaa}{ {\mbox{\boldmath $\Omegaa$}} }
\newcommand{\bfpi}{ {\mbox{\boldmath $\pi$}} }
\newcommand{\bfmu}{ {\mbox{\boldmath $\mu$}} }
\newcommand{\bftau}{ {\mbox{\boldmath $\tau$}} }
\newcommand{\bfnu}{ {\mbox{\boldmath $\nu$}} }
\newcommand{\bfrho}{ {\mbox{\boldmath $\rho$}} }
\newcommand{\bfsigma}{ {\mbox{\boldmath $\sigma$}} }
\newcommand{\bfSigma}{ {\mbox{\boldmath $\Sigma$}} }
\newcommand{\bfOmega}{ {\mbox{\boldmath $\Omega$}} }
\newcommand{\bfp}{ {\bf p} }
\newcommand{\bfP}{ {\bf P} }
\newcommand{\bfu}{ {\bf u} }
\newcommand{\bfY}{ {\bf Y} }
\newcommand{\bfx}{{\bf x}}
\newcommand{\bfX}{{\bf X}}
\newcommand{\bfZ}{{\bf Z}}
%\newcommand{\bfy}{{\bf y}}
\newcommand{\Var}{{\rm Var}}
\newcommand{\trt}{{\rm trt}}
\newcommand{\age}{{\rm age}}
\newcommand{\city}{  {\rm city}  }
\newcommand{\smoke}{  {\rm smoke}  }
\newcommand{\Sin}{\sum_{i=1}^N}
\newcommand{\Sjn}{\sum_{j=1}^N}
\newcommand{\ui}{{\bf u}_i}
\newcommand{\uj}{{\bf u}_j}
\newcommand{\bfr}{ {\bf r} }
\newcommand{\bfm}{ {\bf m} }
\newcommand{\bfz}{ {\bf z} }

\newcommand{\bfF}{ {\bf F} }
\newcommand{\bfH}{ {\bf H} }
\newcommand{\bfK}{ {\bf K} }
\newcommand{\bfj}{ {\bf j} }
\newcommand{\bfS}{ {\bf S} }
\newcommand{\bfT}{ {\bf T} }
\newcommand{\bfU}{ {\bf U} }
\newcommand{\bfD}{ {\bf D} }
\newcommand{\bfE}{ {\bf E} }
\newcommand{\bfV}{ {\bf V} }
\newcommand{\bfA}{ {\bf A} }
\newcommand{\bfR}{ {\bf R} }
\newcommand{\bfC}{ {\bf C} }
\newcommand{\bfW}{ {\bf W} }
\newcommand{\bfB}{ {\bf B} }
\newcommand{\bfzero}{ {\bf 0}  }
\newcommand{\bfone}{  {\bf 1}  }
\newcommand{\Corr}{  {\rm Corr}  }
\newcommand{\Cov}{  {\rm Cov}  }
\newcommand{\Diag}{  {\rm Diag}  }
\newcommand{\pr}{  {\rm pr}  }
\newcommand{\bfg}{{\bf g}}
\newcommand{\estimate}{  {\rm estimate}  }
\newcommand{\true}{  {\rm true}  }
\newcommand{\val}{  {\rm value}  }

\newcommand{\bfeps}{ {\mbox{\boldmath $\varepsilon$}} }


\newcommand{\ang}{$\rm \AA$}
\newcommand{\tauross}{$\tau_{\mathrm{ross}}$}
\newcommand{\Msun}{M$_{\odot}$}
\newcommand{\Mbol}{M$_{\rm{bol}}$}
\newcommand{\Rsun}{R$_{\odot}$}
\newcommand{\Lsun}{L$_{\odot}$}
\newcommand{\be}{\begin{equation}}
\newcommand{\ee}{\end{equation}}
\newcommand{\bee}{\begin{eqnarray}}
\newcommand{\ad}{$\theta_d$}
\newcommand{\cc}{$\mathrm{^{12}C/^{13}C}$}
\newcommand{\kn}{$\kappa_{\nu}$}
\newcommand{\lnu}{$l_{\nu}$}
\newcommand{\ha}{H$_{\alpha}$}
\newcommand{\ea}{et al.}
\newcommand{\ene}{\end{eqnarray}}
\newcommand{\teff}{T$_{\mathrm{eff}}$}
\newcommand{\mic}{$\mu$m}
\newcommand{\hoogte}[1]{\rule{0pt}{#1}}
\newcommand{\hminff}{H$^-_{\rm{ff}}$}
%\newcommand{\teffo}{T$_{\mathrm{eff,0}}$}
\usepackage{amssymb}
\begin{document}


\title{\bf Non-Linear Fractional Polynomial for Estimates of Long-Term Persistence of Induced HPV Antibodies: A Hierarchical Bayesian Approach:\\ [5mm] Supplementary Web Appendix}

\author{---blinded---}

\maketitle

\renewcommand{\baselinestretch}{1.5}
\baselineskip=23.5pt

%%%%%%%%%%%%%%%%%%%%%%%%%%%%%%%%%%%%%%%%%%%%%%%%%%%%%%%%%%%%%%%%%%%%%%
%%%%%%%%%%%%%%%%%%%%%%%%%%%%%%%%%%%%%%%%%%%%%%%%%%%%%%%%%%%%%%%%%%%%%%
%%%%%%%%%%%%%%%%%%%%%%%%%%%%%%%%%%%%%%%%%%%%%%%%%%%%%%%%%%%%%%%%%%%%%%
%%%%%%%%%%%%%%%%%%%%%%%%%%%%%%%%%%%%%%%%%%%%%%%%%%%%%%%%%%%%%%%%%%%%%%


\section{Probability of protection for anti-HPV-18 antibodies}
\vspace*{-3.5mm}

In this appendix, we discuss the results for the analysis of the
anti-HPV-18 antibodies and we present also model diagnostics to the
fitted models for both anti-HPV-16 antibodies and anti-HPV-18
antibodies.

Figure~\ref{fighisprob18} shows the histogram of the posterior
probability above a threshold value for anti-HPV-18 antibodies.
There are 118 subjects who have $\widehat{\pi}_{ij}$=1 above a threshold
$\tau$=2.446 while 86 subjects have a $\widehat{\pi}_{ij}$=0 over 50
years. Moreover, there are 186 subjects whose posterior probability
above threshold is between 0 and 1; $0 < \widehat{\pi}_{ij} < 1$. If we
use the threshold $\tau$=1.355, all of the subjects except two
subjects have a posterior probability above a threshold more than
0.5 over 50 years. The left panel of Figure~\ref{probprotunprot}
shows the sorted posterior probabilities above a threshold
$\tau$=2.446 while the right panel shows the posterior probabilities
above the threshold $\tau$=2.446 for subjects who had above/below
threshold value for 10 years. Clearly, among 212 (54.4\%) subjects
who had above the threshold value, 133 subjects have
$\widehat{\pi}_{ij}=1$ while 79 subjects have $0.48 < \widehat{\pi}_{ij}<1$.
On the other hand, among 178 (45.6\%) subjects who had below the
threshold value, 83 subjects have $\widehat{\pi}_{ij}=0$ while 95
subjects have $0 < \widehat{\pi}_{ij} < 0.5$ for 10 years.
\newline Figure~\ref{figindLT18} shows the long term prediction for
some selected subjects while Figure~\ref{figposprob16h18} indicates
their posterior distribution of the probability above the threshold
$\tau$=1.355 for these subjects. We can clearly see that the first
two subjects have a log antibody level below the threshold
$\tau$=1.355, whereas the other two subjects have a log antibody
level above the threshold $\tau$=1.355 for 50 years.


\begin{figure}[htpb]
\begin{center}
\begin{tabular}{ll}
\includegraphics[width=10cm]{hisporbh18.eps}
%&
%\includegraphics[width=6cm]{indlon18.eps}\\
\end{tabular}
\end{center}
\caption{\em The posterior probability above a threshold=2.446 at 10,20, 30 and 50 years for anti-HPV-18 antibodies using non-linear fractional polynomial model.}
\label{fighisprob18}
\end{figure}


\begin{figure}[htpb]
\begin{center}
\begin{tabular}{llll}

\includegraphics[width=6cm]{sorprobh18.eps}
&
\includegraphics[width=6cm]{probprotech18.eps}\\

\end{tabular}
\end{center}
\caption{\em anti-HPV-18 antibodies; Subject-specific sorted
posterior probability above a threshold 2.446 (Left Panel) and
posterior probability above a threshold 2.446 for 10 years for
subjects who had above/below a threshold value (Right Panel) using
non-linear fractional polynomial model. Index represents the number
of subjects.} \label{probprotunprot}

\end{figure}

\begin{figure}[t]
\begin{center}
\begin{tabular}{llll}

\includegraphics[width=10cm]{indvpredh18.eps}


\end{tabular}
\end{center}
\caption{\em Long term (50 Years) prediction with posterior
predictive interval of some selected subjects for anti-HPV-18
antibodies using non-linear fractional polynomial model.}
\label{figindLT18}
\end{figure}

\begin{figure}[t]
\begin{center}
\begin{tabular}{ll}
\includegraphics[width=10cm]{posindvh18.eps}
%&
%\includegraphics[width=6cm]{indlon18.eps}\\
\end{tabular}
\end{center}
\caption{\em The posterior distribution of the probability above the threshold $\tau$=1.355 for some selected subject for anti-HPV-18 antibodies using non-linear fractional polynomial model.}
\label{figposprob16h18}
\end{figure}


%%%%%%%%%%%%%%%%%%%%%%%%%%%%%%%%%%%%%%%%%%%%%%%%%%%%%%%%%%%%%%%%%%%%%%
%%%%%%%%%%%%%%%%%%%%%%%%%%%%%%%%%%%%%%%%%%%%%%%%%%%%%%%%%%%%%%%%%%%%%%
%%%%%%%%%%%%%%%%%%%%%%%%%%%%%%%%%%%%%%%%%%%%%%%%%%%%%%%%%%%%%%%%%%%%%%
%%%%%%%%%%%%%%%%%%%%%%%%%%%%%%%%%%%%%%%%%%%%%%%%%%%%%%%%%%%%%%%%%%%%%%


\section{Model Diagnostics}
\vspace*{-3.5mm}

For both anti-HPV-16 antibodies and anti-HPV-18 antibodies,
convergence diagnostics were constructed using trace plots,
Brooks-Gelman-Rubin (BGR) plots, and potential scale reduction
factor ($\widehat{R}$; Brooks and Gelman, 1998). The results for the
trace plots for anti-HPV-16 antibodies and anti-HPV-18 antibodies
are shown in Figure~\ref{figtracploth16} and
Figure~\ref{figtracploth18}, respectively, while the BGR plots are
displayed in Figure~\ref{figBGRploth16} and
Figure~\ref{figBGRploth18}, respectively. Table~\ref{tablerhat}
shows the result of $\widehat{R}$. We can clearly see that all the model
diagnostics methods show good convergence. As a practical rule of
thumb, a 97.5\% quantile of $\widehat{R}\leq 1.2$ is sufficient to claim
convergence (Smith, 2007). Hence, the estimates of $\widehat{R}$ in
Table~\ref{tablerhat} show rapid convergence and efficient mixing of
the chains for all the parameters. Note that the notations sigma.bo,
sigma.b1, sigma, and rhom in the figures denote the variance of the
random intercept, random slope, measurement error and the
correlation between the random intercept and the random slope,
respectively, and p1 shows the power parameter.


\begin{figure}[htpb]
\begin{center}
\begin{tabular}{ll}
\includegraphics[width=6cm]{traceh16.eps}
&
\includegraphics[width=6cm]{traceh161.eps}\\
\end{tabular}
\end{center}
\caption{\em Trace plot for anti-HPV-16 antibodies for non-linear fractional polynomial model.}
\label{figtracploth16}
\end{figure}


\begin{figure}[htpb]
\begin{center}
\begin{tabular}{ll}
\includegraphics[width=6cm]{traceh18f.eps}
&
\includegraphics[width=6cm]{traceh182.eps}\\
\end{tabular}
\end{center}
\caption{\em Trace plot for anti-HPV-18 antibodies for non-linear fractional polynomial model.}
\label{figtracploth18}
\end{figure}


\begin{figure}[htpb]
\begin{center}
\begin{tabular}{ll}
\includegraphics[width=10cm]{bgrh16.eps}
%&
%\includegraphics[width=6cm]{indlon18.eps}\\
\end{tabular}
\end{center}
\caption{\em Brooks, Gelman and Rubin's plot for anti-HPV-16 antibodies for non-linear fractional polynomial model.}
\label{figBGRploth16}
\end{figure}


\begin{figure}[htpb]
\begin{center}
\begin{tabular}{ll}
\includegraphics[width=10cm]{bgrh18c.eps}
%&
%\includegraphics[width=6cm]{indlon18.eps}\\
\end{tabular}
\end{center}
\caption{\em Brooks, Gelman and Rubin's plot for anti-HPV-18 antibodies for non-linear fractional polynomial model.}
\label{figBGRploth18}
\end{figure}


%%%%%%%%%%%%%%%%%%%%%%%%%%%%%%%%%%%%%%%%%%%%%%%%%%%%%%%%%%%%%%%%%%%%%%
%%%%%%%%%%%%%%%%%%%%%%%%%%%%%%%%%%%%%%%%%%%%%%%%%%%%%%%%%%%%%%%%%%%%%%
%%%%%%%%%%%%%%%%%%%%%%%%%%%%%%%%%%%%%%%%%%%%%%%%%%%%%%%%%%%%%%%%%%%%%%
%%%%%%%%%%%%%%%%%%%%%%%%%%%%%%%%%%%%%%%%%%%%%%%%%%%%%%%%%%%%%%%%%%%%%%

\section{Modeling the Mean Antibody Using a Modified Power-law Model}
To investigate the robustness of the inferences drawn from the
non-linear fractional polynomial (NLFP) model, we considered the
modified power-law model proposed by Fraser \textit{et al.}~(2007).
These authors extended the power-law model to account for two
populations of B-cells, including activated and memory B-cells,
which impose a long-term antibody plateau. Their model is given by:
\[
Y_{ij} = b_{0i} + \log [(1-\pi)(c + t_{ij})^{-b_{1i}} + \pi]+\varepsilon_{ij},
\]
where $\varepsilon_{ij}\sim N(0,\sigma^2_{\varepsilon})$ and $\pi$
is the relative level of antibody produced in the long-term memory
plateau (between 0 and 1). A value of $\pi >0$ shows long-term
antibody persistence. The parameter $\beta_{0}$ is the peak log level, $\beta_{1}$ is the
decay rate, and $c$ is an arbitrary small constant (often set to
zero). The modified power-law model enforce an asymptote for the
antibody levels at $t_{ij} \rightarrow \infty$ and, as a result, the
expected value of individual antibody level reaches a constant value
in the long run. Note that for $\pi = 0$, the modified power-law
model is reduced to standard power-law model.

Similar to the non-linear fractional polynomial model, an independent normal prior was
used for $\beta_0$ and $\beta_1$, whereas a gamma prior was
employed for the precisions, $\sigma^{-2}_{\varepsilon} \sim G(0.01,0.01)$. Further, we assumed a uniform prior distribution for $\pi$, $\pi \sim \mbox{U}(0,1)$. For the 
subject-specific parameters,  $b_{0i}$ and $b_{1i}$, we specified a bivariate normal distribution prior, i.e.,
\[
 \left[ \begin{array}{l}
      b_{0i}  \\
      b_{1i} \\
       \end{array} \right ]
\sim MVN
\left ( \left [
\begin{array}{l}
      \beta_{0} \\
      \beta_{1}  \\
       \end{array}
\right],
\textbf{D}=
\left[
\begin{array}{ll}
      \sigma^2_{b_0} & \rho_{b_0b_1}\sigma_{b_0}\sigma_{b_1} \\
      \rho_{b_0b_1}\sigma_{b_0}\sigma_{b_1} & \sigma^2_{b_1} \\
       \end{array}
\right ]
\right ).
\]
We assumed an inverse Wishart prior distribution for the covariance
matrix $\textbf{D}$, i.e.,
$$
\textbf{D}^{-1} \sim \mbox{Wishart}(R_{D},2).
%\label{priord}
$$
Here $R_{D}$ is $2 \times 2$ identity matrix.

 We implemented the modified power-law model using a Markov Chain
Monte Carlo (MCMC) sampling procedure with three chains of 100,000
iterations, a burn-in length of 20,000 and thinning equal to 100.
The trace plot, Brooks, Gelman, and Rubin's (BGR) plot
(Figures~\ref{figBGRploth16MPL} and \ref{figBGRploth18MPL}), and
estimated potential scale reduction factor (Table~\ref{MPLh16h18})
show good convergence for all the model parameters.

The posterior summary statistics using the modified power-law model
are shown in Table~\ref{MPLh16h18}. For both anti-HPV-16 and
anti-HPV-18 antibodies, the DIC value for the non-linear fractional
polynomial (NLFP) is smaller than that of the modified power-law
(MPL) model, indicating that the NLFP fits to the data better than
the MPL model.

Figure~\ref{figLT1618MPL} shows the long-term posterior predicted
means for anti-HPV-16 and anti-HPV-18 antibodies using the MPL
model. The results are comparable with the results obtained from the
non-linear fractional polynomial model (also for probabilities
of being above a threshold, see Figures~\ref{fighisprob16MPL}, \ref{fighisprob18MPL}, and
\ref{sortprobh16h18}). 

 \begin{table}[t]
\caption{\em \label{tablerhat} Estimate of the potential scale
reduction factor ($\widehat{R}$).}
\begin{center}
%\small\addtolength{\tabcolsep}{-5pt}
\scalebox{0.99}{%
\begin{tabular}{cccccc}
\hline  \hline
       & \multicolumn{2}{c}{anti-HPV-16 antibodies}  & \multicolumn{2}{c}{anti-HPV-18 antibodies}   \\
 \cline{2-5}
 Parameter &  Point est. & 97.5\% quantile &Point est.&97.5\% quantile\\
\hline
$\beta{0}$ &1.01&1.02&1.01&1.03\\
%\hline
$\beta{1}$ &1.01&1.02&1.02&1.06\\
%\hline
$\sigma$ &1.00&1.00&1.00&1.00\\
%\hline
$\sigma_{b_{0}}$ &1.00&1.00&1.00&1.00\\
%\hline
$\sigma_{b_{1}}$&1.00&1.01&1.01&1.04\\
%\hline
$\rho_{12}$&1.00&1.00&1.00&1.00\\
%\hline
p&1.01&1.02&1.03&1.07 \\
deviance&1.00&1.00&1.00&1.00\\
%\hline
\hline\hline
\end{tabular} }
\end{center}
\end{table}


\begin{table}[t]
\caption{\em \label{MPLh16h18} Posterior summary statistics of the
modified power-law model for anti-HPV-16 and anti-HPV-18
antibodies.} \addtolength{\tabcolsep}{-1mm}
\begin{center}
%\small\addtolength{\tabcolsep}{-5pt}
\scalebox{0.99}{%
\begin{tabular}{ccccccccccc}
\hline  \hline
  &  \multicolumn{4}{c}{HPV-16}   &  \multicolumn{5}{c}{HPV-18} \\
  \hline
% \cline{2-5}  \cline{6-9}  \\
  Parameters  & mean & sd & MC error& 95 \% CI &$\widehat{R}$& mean &sd& MC error& 95\% CI&$\widehat{R}$ \\
\hline
$\beta_{0}$ &      6.672 &0.106&0.008&(6.455,6.872)&1.01&6.444&0.096&0.008&(6.252,6.625)&1.02\\
%\hline
$\beta_{1}$ &      1.828&0.049&0.004&(1.725,1.92)&1.01&1.731&0.046&0.004&(1.641,1.818)&1.02\\
%\hline
$\sigma_{b_0}$ & 0.453&0.017&3.86E-4&(0.420,0.489)&1.00&0.448 &0.016&0.0003&(0.418,0.482)&1.00\\
%\hline
$\sigma_{b_1}$ &11.44&1.198&0.074&(9.183,13.91)&1.00& 7.846& 0.781&0.051 &(6.412,9.441)&1.02\\
%\hline
$\sigma_{\varepsilon}$&0.185&0.003&6.104E-5&(0.179,0.191)&1.00& 0.171 & 0.003&6.42E-5 &(0.166,0.177)&1.00\\
$\rho_{b_0b_1}$ &-0.388&0.054&0.001&(-0.489,-0.274)&1.00& -0.583     & 0.046   & 8.24E-4     & (-0.668,-0.485)&1.00\\
$\pi$    & 0.018    & 0.002     &  1.39E-4     & (0.014,0.022)&1.01& 0.019    &  0.002   & 1.46E-4 &(0.016,0.023)&1.02\\
%\hline
$DIC$  &   -752.71   & &     &                    & &    -1182.24    &  &       &       &       \\
\hline \hline
\end{tabular} }
\end{center}
\end{table}

\begin{figure}[htpb]
\begin{center}
\begin{tabular}{ll}
\includegraphics[width=7.5cm]{lonpredhh16MPL.eps}
&
\includegraphics[width=7.5cm]{lonpredhh18MPL.eps}
\end{tabular}
\end{center}
\caption{\em Long-term prediction with posterior predictive interval
over 50 years for anti-HPV-16 (left panel) and anti-HPV-18
antibodies (right panel) using the modified power-law model.}
\label{figLT1618MPL}
\end{figure}

\begin{figure}[htpb]
\begin{center}
\begin{tabular}{ll}
\includegraphics[width=10cm]{probhistMPLt10-50h16.eps}
%&
%\includegraphics[width=6cm]{indlon18.eps}\\
\end{tabular}
\end{center}
\caption{\em The posterior probability above a threshold=2.621 at 10,20, 30 and 50 years for anti-HPV-16 antibodies using the modified power-law model.}
\label{fighisprob16MPL}
\end{figure}


\begin{figure}[htpb]
\begin{center}
\begin{tabular}{ll}
\includegraphics[width=10cm]{probhistMPLt10-50h18.eps}
%&
%\includegraphics[width=6cm]{indlon18.eps}\\
\end{tabular}
\end{center}
\caption{\em The posterior probability above a threshold=2.446 at 10,20, 30 and 50 years for anti-HPV-18 antibodies using the modified power-law model.}
\label{fighisprob18MPL}
\end{figure}


\begin{figure}[htpb]
\begin{center}
\begin{tabular}{llll}

\includegraphics[width=6cm]{sorprobh16MPL.eps}
&
\includegraphics[width=6cm]{sorprobh18MPL.eps}\\

\end{tabular}
\end{center}
\caption{\em Subject-specific sorted posterior probability of being
above a threshold for anti-HPV-16 antibodies (Left Panel) and for
anti-HPV-18 antibodies (Right Panel) using modified power-law model.
Index represents the number of subjects.} \label{sortprobh16h18}

\end{figure}


%\begin{figure}[htpb]
%\begin{center}
%\begin{tabular}{ll}
%\includegraphics[width=10cm]{bgrh16.eps}
%&
%\includegraphics[width=6cm]{indlon18.eps}\\
%\end{tabular}
%\end{center}
%\caption{\em Brooks, Gelman and Rubin's plot for anti-HPV-16 antibodies for non-%linear fractional polynomial model.}
%\label{figBGRploth16}
%\end{figure}


%\begin{figure}[htpb]
%\begin{center}
%\begin{tabular}{ll}
%\includegraphics[width=10cm]{bgrh18c.eps}
%&
%\includegraphics[width=6cm]{indlon18.eps}\\
%\end{tabular}
%\end{center}
%\caption{\em Brooks, Gelman and Rubin's plot for anti-HPV-18 antibodies for non-%linear fractional polynomial model.}
%\label{figBGRploth18}
%\end{figure}

\begin{figure}[htpb]
\begin{center}
\begin{tabular}{ll}
\includegraphics[width=10cm]{bgrmodPL.ps}
%&
%\includegraphics[width=6cm]{indlon18.eps}\\
\end{tabular}
\end{center}
\caption{\em Brooks, Gelman and Rubin's plot for anti-HPV-16 antibodies for modified power-law model.}
\label{figBGRploth16MPL}
\end{figure}


\begin{figure}[htpb]
\begin{center}
\begin{tabular}{ll}
\includegraphics[width=10cm]{bgrMPLh18.ps}
%&
%\includegraphics[width=6cm]{indlon18.eps}\\
\end{tabular}
\end{center}
\caption{\em Brooks, Gelman and Rubin's plot for anti-HPV-18 antibodies for modified power-law model.}
\label{figBGRploth18MPL}
\end{figure}


%\begin{figure}[htpb]
%\begin{center}
%\begin{tabular}{ll}
%\includegraphics[width=6cm]{traceh16.eps}
%&
%\includegraphics[width=6cm]{traceh161.eps}\\
%\end{tabular}
%\end{center}
%\caption{\em Trace plot for anti-HPV-16 antibodies for non-linear fractional %polynomial model.}
%\label{figtracploth16}
%\end{figure}


%\begin{figure}[htpb]
%\begin{center}
%\begin{tabular}{ll}
%\includegraphics[width=6cm]{traceh18f.eps}
%&
%\includegraphics[width=6cm]{traceh182.eps}\\
%\end{tabular}
%\end{center}
%\caption{\em Trace plot for anti-HPV-18 antibodies for non-linear fractional %polynomial model.}
%\label{figtracploth18}
%\end{figure}

\end{document}


\newpage
\section*{References}
\vspace*{-3.5mm}
\begin{list}{}{\setlength{\leftmargin}{.3in}\setlength{\itemindent}{-.2in}}

\item
Brooks, S.P., and Gelman, A. (1998). General methods for monitoring
convergence of iterative simulations. {\em Journal of Computational
and Graphical Statistics\/}, {\bfseries 7}, 434�-55.

\item
Smith, B.J. (2007). Boa: an R package for MCMC output convergence
assessment and posterior inference. {\em Journal of Statistical
Software \/}, {\bfseries 21}, 1�-37.

\end{list}

\end{document}
